# Supplementary material for: Enhancer of polycomb coordinates multiple signaling pathways to promote both cyst and germline stem cell differentiation in the Drosophila adult testis
Source: PLoS Genet. 2017 Feb 14;13(2):e1006571. doi: 10.1371/journal.pgen.1006571 (PMC5308785; doi:10.1371/journal.pgen.1006571)
Supplement: S4 Table — (XLSX) [file pgen.1006571.s016.xlsx]

## Sheet: Sheet1
S4 Table: Primers used for ChIP-qPCR analyses.
		GFP ChIP-qPCR at yan locus
		P1 Forward	CTTTACGGCTGGCATTTGTC
		P1 Reverse	TGTGTTGCTGTTTCCTTTTGG
		P2 Forward	CTCTTTGCTTCTCTTTCTCTTTCG
		P2 Reverse	TGTCTAGTTGCTTTCAGGAGC
		P3 Forward	ATGCAAGTCTCTCAAGCTCTG
		P3 Reverse	TGATGCGCCAGTCTTATATGAG
		P4 Forward	ATTACCTCTGCGAGCTGTTG
		P4 Reverse	CTGAGAAGTAGGAGTGTGTGC
		P5 Forward	CAAAGAGATTTTCCGTCGCAG
		P5 Reverse	AGCTGATAGGTGTTTTCGATCC
		H4 Ace ChIP-qPCR at yan locus
		P1 Forward	ACCACACTTCCACAACCC
		P1 Reverse	TTCTCCTAACTCTGTTCATTCCG
		P2 Forward	ATATGACTTCCCCACTTCGC
		P2 Reverse	GCGAACCAAATATAGCCCAAG
		P3 Forward	GTGTTTACATTGCCCGGTG
		P3 Reverse	TCGTCTTCCTTTTCACTTTTGC
		P4 Forward	ATTACCTCTGCGAGCTGTTG
		P4 Reverse	CTGAGAAGTAGGAGTGTGTGC
		P5 Forward	CAAAGAGATTTTCCGTCGCAG
		P5 Reverse	AGCTGATAGGTGTTTTCGATCC
		H4 Ace ChIP-qPCR at zfh-1 locus
		P1 Forward	CCGCAAATCTTTCAACGCAG
		P1 Reverse	TGGAAATGGGAGTGGAAAGG
		P2 Forward	TTCGTTTTACCCCTGATTCCC
		P2 Reverse	GAAGACAGTAGGCAAGCGG
		P3 Forward	AGATCGTAGAATGGGAGAAATGG
		P3 Reverse	GCTGTTCAAAAGTGTCACCTC
		P4 Forward	CTCCCACATGACCTCCAAG
		P4 Reverse	TTGCCCTTTCCGTGATCG
		P5 Forward	ACACTGTATTAAAGCCACCCC
		P5 Reverse	GTAAGTGAGCTTGAAACGCG
